# Supplementary material
Source: PubMed Central journal article supplement (PMC4297734)
Supplement: NIHMS644438-supplement-1.pdf [file NIHMS644438-supplement-1.pdf]

Supplemental Figure 1

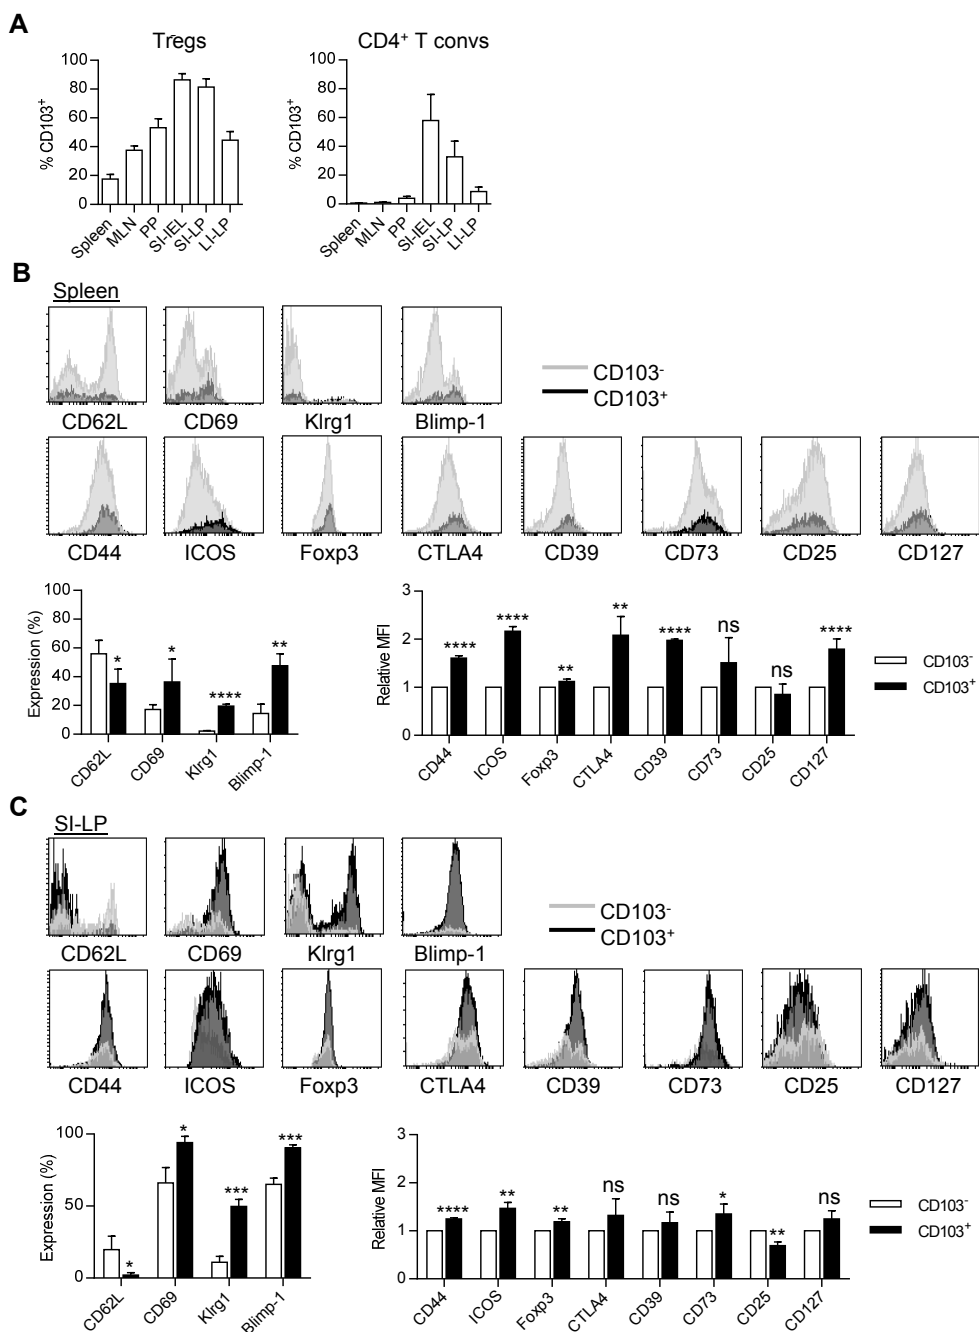

Supplemental Figure 1. **The comparison of CD103<sup>-</sup>, CD103<sup>-</sup> Treg subsets.** (A) The proportion of CD103<sup>+</sup> Tregs and CD103<sup>+</sup> CD4<sup>+</sup> Foxp3<sup>-</sup> T conventional cells (T convs) in various tissues from WT mice were assessed by flow cytometry (n = 3-9 mice). (B, C) CD103<sup>-</sup> and CD103<sup>+</sup> Tregs from spleen (B) and SI-LP (C) of WT mice were analyzed for the expression of marks as indicated and the percent of expression or relative mean fluorescence intensity (MFI) was determined by flow cytometry. The expression of Blimp-1 in Tregs was measured according to the GFP expression from Blimp-1/GFP/Foxp3/RFP reporter mice. The relative MFIs of CD103<sup>-</sup> and CD103<sup>+</sup> Tregs were normalized to CD103<sup>-</sup> Tregs (n = 3-5 mice).

**Supplemental Figure 2**

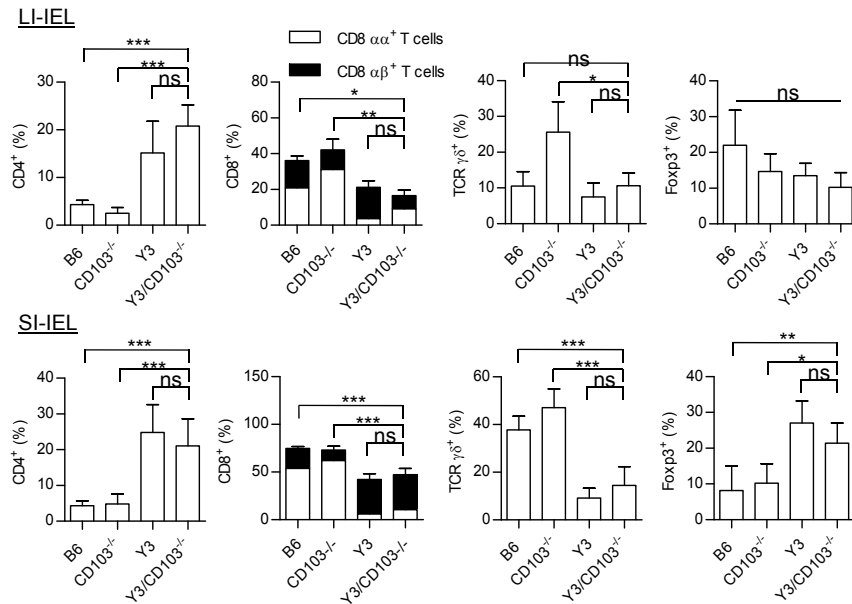

Supplemental Figure 2. **T cell profile in the IEL compartment of the small and large intestine.** The proportion of CD4<sup>+</sup> T cells, CD8 αα<sup>+</sup> T cells, CD8 αβ<sup>+</sup> T cells, TCR γδ<sup>+</sup> and CD4<sup>+</sup> Foxp3<sup>+</sup> Tregs in the IEL compartment of small (n = 5-7 mice) and large intestine (n = 4-5 mice) was determined by flow cytometry. Age-matched 12-24 week-old mice were assessed for each genotype.
